# Supplementary material for: Furosemide/Non-Steroidal Anti-Inflammatory Drug–Drug Pharmaceutical Solids: Novel Opportunities in Drug Formulation
Source: MDPI journal article supplement (doi:10.3390/cryst11111339), 2021-11-02
Supplement: s1 [file s1]

Archive with 1 entries (1 files):
- crystals-1446849-Suplementary_material.pdf
